# Supplementary material
Source: publisher site journal article supplement (https://www.dovepress.com/article/416295)
Supplement: Supplementary file 1 [file get_supplementary_file.php]

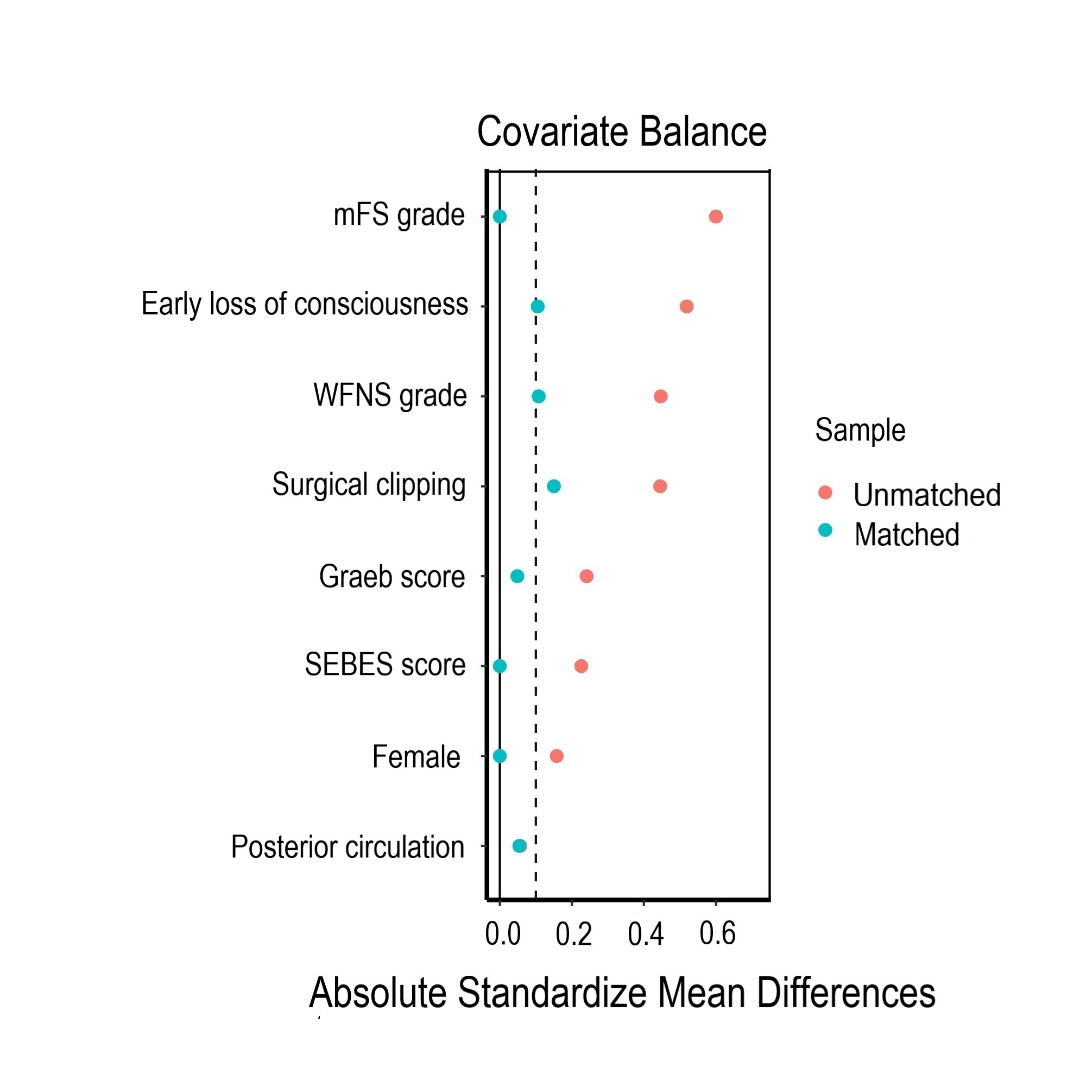


**Supplementary Figure 1** Comparison of confounding factors before and after propensity score matching.
**Notes**: Propensity score matching (caliper 0.02, ratio 1:1, nearest neighbor approach) was performed according to the following parameters: Female, Early loss of consciousness, WFNS grade, mFS grade, Graeb score, SEBES score, Acute hydrocephalus and surgical clipping. After PS matching, 2 evenly balanced cohorts consisting of 57 patients each and without significant differences in outcome-relevant parameters were available for further analyses.
**Abbreviations:** WFNS, world federation of neurological societies; mFS, modified Fisher; SEBES, subarachnoid hemorrhage early brain edema score; IBI, inflammatory burden index

**Supplementary Table 1. In-hospital Complications and Definitions**

| In-hospital complications | Definitions |
| --- | --- |
| Delayed cerebral ischemia | New focal neurological deficit or global neurological deterioration (a drop of ≥ 2 points on the Glasgow Coma Scale [GCS]) lasting > 2 hours, after exclusion of intracranial hemorrhage, hydrocephalus, seizures, metabolic derangements, and infection, with or without radiological signs of cerebral vasospasm. |
| Intracranial infection | (1) The patient had clinical manifestations of various intracranial infections such as postoperative fever, headache, or neck stiffness. (2) The patient’s cerebrospinal fluid test showed inflammatory index changes, which met one of the following: white blood cell count > 0.01 × 109 /L; cerebrospinal fluid protein > 4.50 g/L; cerebrospinal fluid glucose < 2.50 mmol/L. (3) The peripheral blood white blood cell count was > 10 × 109 /L. |
| Hypoproteinemia | Total protein < 60g/L or albumin < 30g/L. |
| Pneumonia | Description of clinical indications or positive chest radiograph. |
| Deep vein thrombosis | Clinical diagnosis of deep vein thrombosis supported by ultrasound or venography. |

**Supplementary Table 2. Comparison of Unadjusted and Risk-Adjusted Outcomes by ln IBI**

| Outcome parameters | Unadjusted(n=408) | | Multivariable regression adjustment (n=408) | |
| --- | --- | --- | --- | --- |
| OR (95% CI) | p Value | OR (95% CI) | p Value |
| mRS 3-6 at 3-month | 1.432 (1.223-1.677) | **＜0.001** | 1.362 (1.148-1.615) | **＜0.001** |
| Delayed cerebral ischemia | 1.158 (1.010-1.326) | **0.034** | 1.101 (0.958-1.265) | 0.177 |
| Intracranial infection | 1.108 (0.913-1.346) | 0.300 | 1.068 (0.883-1.291) | 0.500 |
| Hypoproteinemia | 1.071 (0.945-1.215) | 0.283 | 0.984 (0.861-1.124) | 0.811 |
| Pneumonia | 1.455 (1.267-1.671) | **＜0.001** | 1.427 (1.227-1.659) | **＜0.001** |
| Deep Vein Thrombosis | 1.326 (1.124-1.564) | **0.001** | 1.326 (1.124-1.564) | **0.001** |

**Notes:** Multivariable regression: adjusted for Female, WFNS grade, mFS grade, GRAEB score, SEBES score, Acute hydrocephalus and surgical clipping. As indicated by the bold font, the p Value reached statistical significance.

**Abbreviations**: ln IBI, the natural logarithm of “inflammatory burden index”; OR, odds ratio; CI, con confidence intervals

**Supplementary Table 3. Comparison of Unadjusted and Risk-Adjusted Outcomes by ln MLR**

| Outcome parameters | Unadjusted(n=408) | | Multivariable regression adjustment (n=408) | |
| --- | --- | --- | --- | --- |
| OR (95% CI) | p Value | OR (95% CI) | p Value |
| mRS 3-6 at 3-month | 4.147 (2.543-6.762) | **＜0.001** | 2.935 (1.684-5.117) | **＜0.001** |
| Delayed cerebral ischemia | 1.640 (1.102-2.440) | **0.015** | 1.210 (0.776-1.887) | 0.399 |
| Intracranial infection | 1.079 (0.613-1.899) | 0.792 | 0.863 (0.484-1.537) | 0.616 |
| Hypoproteinemia | **1.521 (1.049-2.206)** | **0.027** | 0.985 (0.645-1.505) | 0.946 |
| Pneumonia | 2.400 (1.633-3.528) | **＜0.001** | 1.394 (0.894-2.173) | 0.143 |
| Deep Vein Thrombosis | 1.300 (0.817-2.068) | 0.268 | 1.074 (0.636-1.812) | 0.789 |

**Notes:** Multivariable regression: adjusted for Female, WFNS grade, mFS grade, GRAEB score, SEBES score, Acute hydrocephalus and surgical clipping. As indicated by the bold font, the p Value reached statistical significance.

**Abbreviations**: ln MLR, the natural logarithm of “monocytes to lymphocytes ratio”; OR, odds ratio; CI, con confidence intervals

**Supplementary Table 4 Comparison of Unadjusted and Risk-Adjusted Outcomes by ln SIRI**

| Outcome parameters | Unadjusted(n=408) | | Multivariable regression adjustment (n=408) | |
| --- | --- | --- | --- | --- |
| OR (95% CI) | p Value | OR (95% CI) | p Value |
| mRS 3-6 at 3-month | 2.735 (1.955-3.826) | **＜0.001** | 2.450 (1.651-3.635) | **＜0.001** |
| Delayed cerebral ischemia | 1.431 (1.091-1.877) | **0.010** | 1.130 (0.825-1.549) | 0.447 |
| Intracranial infection | 1.074 (0.731-1.579) | 0.716 | 0.945 (0.639-1.399) | 0.778 |
| Hypoproteinemia | 1.387 (1.075-1.789) | **0.012** | 0.994 (0.735-1.345) | 0.970 |
| Pneumonia | 2.096 (1.596-2.751) | **＜0.001** | 1.348 (0.979-1.855) | 0.067 |
| Deep Vein Thrombosis | 1.209 (0.881-1.658) | 0.241 | 1.052 (0.718-1.542) | 0.794 |

**Notes:** Multivariable regression: adjusted for Female, WFNS grade, mFS grade, GRAEB score, SEBES score, Acute hydrocephalus and surgical clipping. As indicated by the bold font, the p Value reached statistical significance.

**Abbreviations**: ln SIRI, the natural logarithm of “Systemic Inflammation Response Index”; OR, odds ratio; CI, con confidence intervals

**Supplementary Table 5. Patient Characteristics Before and After** **Multiple Imputation Method**

|  | Multiple Imputation | | p Value |
| --- | --- | --- | --- |
| Patient Characteristics | Pre (n=408) | Post (n=528) |
| Age, yrs, mean±SD | 55.28±12.26 | 55.71±11.35 | 0.577 |
| Female n (%) | 235 (57.6) | 312 (59.1) | 0.646 |
| Prior medical history |  |  |  |
| Hypertension, n (%) | 222 (54.4) | 276 (52.3) | 0.515 |
| Hyperlipidemia, n(%) | 28 (6.9) | 26 (4.9) | 0.207 |
| Diabetes mellitus, n (%) | 25 (6.1) | 30 (5.7) | 0.774 |
| Heart Disease, n (%) | 31 (7.6) | 68 (12.9) | **0.009** |
| Aneurysm characteristics |  |  |  |
| Posterior circulation, n(%) | 42 (10.3) | 57 (10.8) | 0.805 |
| Neurological data/score |  |  |  |
| Early seizures, n (%) | 22 (5.4) | 17 (3.2) | 0.099 |
| Early loss of consciousness, n (%) | 110 (27.0) | 153 (29.0) | 0.496 |
| WFNS grade 4-5, n (%) | 83 (20.3) | 114 (21.6) | 0.642 |
| mFS grade 3-4, n (%) | 281 (68.9) | 333 (63.1) | 0.642 |
| Graeb score 5-12, n (%) | 32 (7.8) | 42 (8.0) | 0.950 |
| SEBES score 3-4, n (%) | 168 (41.2) | 240 (45.5) | 0.191 |
| Acute hydrocephalus, n (%) | 168 (41.2) | 202 (38.3) | 0.365 |
| Laboratory values on admission |  |  |  |
| IBI a, median (IQR) | 24.51 (9.45-70.83) | 25.24 (10.65-76.14) | 0.350 |
| N/L, median (IQR) | 11.46 (7.29-16.95) | 11.98 (7.56-17.94) | 0.356 |
| C-reactive protein b, median (IQR) | 2.24 (1.00-5.87) | 2.44 (1.04-5.82) | 0.675 |
| Neutrophils c, median (IQR)c | 11.00 (8.40-13.72) | 10.72 (8.63-13.83) | 0.794 |
| Lymphocytes d, median (IQR) | 0.98 (0.71-1.35) | 0.98 (0.71-1.30) | 0.235 |
| Glucose e, median (IQR) | 7.69 (6.62-9.26) | 6.61 (6.61-9.02) | 0.929 |
| Hemoglobin f, median (IQR) | 141 (129-151) | 130 (130-151) | 0.984 |
| Leukocytes g, median (IQR) | 12.56 (9.96-15.29) | 10.09 (9.71-15.26) | 0.960 |
| Platelet h, median (IQR) | 225 (189-273) | 225 (189-267) | 0.516 |
| Monocytes i, median (IQR) | 0.40 (0.28-0.57) | 0.42 (0.27-0.57) | 0.377 |
| Treatment modality |  |  |  |
| Surgical clipping, n (%) | 204 (50.0) | 300 (56.8) | **＜0.001** |
| Endovascular coiling, n (%) | 204 (50.0) | 228 (43.2) | **＜0.001** |
| Outcome parameters |  |  |  |
| mRS 3-6 at 3-month, n (%) | 88 (21.6) | 107 (20.3) | 0.626 |
| Delayed cerebral ischemia, n (%) | 116 (28.4) | 136 (25.8) | 0.360 |
| Intracranial infection, n (%) | 44 (10.8) | 75 (14.2) | 0.119 |
| Hypoproteinemia, n (%) | 147 (36.0) | 189 (35.8) | 0.941 |
| Pneumonia, n (%) | 167 (40.9) | 207 (39.2) | 0.593 |
| Deep Vein Thrombosis, n (%) | 71 (17.1) | 156 (29.5) | **＜0.001** |

**Notes:** aunit of measurement: mg/L bunit of measurement: mg/L cunit of measurement: 109/L dunit of measurement: 109/L eunit of measurement: mg/L funit of measurement: g/L gunit of measurement: 109/L hunit of measuremen iunit of measurement: 109/L As indicated by the bold font, the p Value reached statistical significance.

**Abbreviations:** ASMD, Absolute Standardized Mean Difference; WFNS, world federation of neurological societies; mFS, modified Fisher; SEBES, subarachnoid hemorrhage early brain edema score; IBI, inflammatory burden index; N/L, neutrophils to lymphocytes ratio; mRS, modified Rankin Scale
